# Supplementary material for: Effect of Fortified Inoculation with Indigenous Lactobacillus brevis on Solid-State Fermentation of Light-Flavor Baijiu
Source: MDPI journal article supplement (doi:10.3390/foods12234198), 2023-11-21
Supplement: s1 [file s1]

Table S1. Primers and real-time quantitative PCR conditions used

| PCR target(gene)                  | Primer name | Primer sequence         | Amplicon size | PCR cycling conditions                                                                                                             | Reference |
|-----------------------------------|-------------|-------------------------|---------------|------------------------------------------------------------------------------------------------------------------------------------|-----------|
| Total bacterial population (16S)  | P1          | CCTACGGGAGGCAGCAG       | 196 bp        | 94°C for 10 s, then 40 cycles of 94°C for 5 s, 58°C for 15 s, 72°C for 15 s, and finally one cycle of 72°C for 5 min.              | [38]      |
|                                   | P2          | ATTACCGCGGCTGCTGG       |               |                                                                                                                                    |           |
| Total fungal population (18S)     | F1          | GCGGTAATTCCAGCTCCAA TAG | 151 bp        | one cycle of 94°C for 10 s, then 45 cycles of 94°C for 5 s, 56°C for 15 s, 72°C for 15 s, and finally one cycle of 72°C for 5 min. | [38]      |
|                                   | F2          | GCCACAAGGACTCAAGGTT AG  |               |                                                                                                                                    |           |
| <i>Lactobacillus brevis</i> (16S) | Lbrev F     | TGCACTGATTTCACAATG AAG  | 160 bp        | 2 min at 98°C followed by 35 cycles of 5 s at 98°C and 30 s at 56.5°C.                                                             | [39]      |
|                                   | Lbrev R     | CCAGAAGTGATAGCCGAA GC   |               |                                                                                                                                    |           |
| <i>Lactobacillus</i> (16S)        | F-lac       | GCAGCAGTAGGGAATCTT CCA  | 349 bp        | 95°C for 30 s; 40 cycles of 95°C for 10 s and 62°C for 30 s.                                                                       | [40]      |
|                                   | R-lac       | GCATTYCACCGCTACACAT G   |               |                                                                                                                                    |           |
| <i>Saccharomyces</i> (ITS1)       | SC1         | GAAAACTCCACAGTGTGTT G   | 124 bp        | 5 min at 98°C followed by 40 cycles of 15 s at 98°C, 30 s at 63°C, and 30 s at 72°C.                                               | [41]      |
|                                   | SC2         | GCTTAAGTGCGCGGTCTTG     |               |                                                                                                                                    |           |

Table S2 Lactic acid bacteria isolated in fermented grains

| Strain ID | Species                        | Related GenBank<br>sequence | Identity<br>(10%) |
|-----------|--------------------------------|-----------------------------|-------------------|
| Lbu1      | <i>Lactobacillus buchneri</i>  | AB205055                    | 100               |
| Lbu2      | <i>Lactobacillus buchneri</i>  | AB205055                    | 100               |
| Lbu3      | <i>Lactobacillus buchneri</i>  | LC094429                    | 99                |
| Lbu4      | <i>Lactobacillus buchneri</i>  | HM058334.1                  | 100               |
| Lbu5      | <i>Lactobacillus buchneri</i>  | LC094429                    | 99                |
| Lbr6      | <i>Lactobacillus brevis</i>    | DQ268866                    | 100               |
| Lbr7      | <i>Lactobacillus brevis</i>    | KT780303                    | 99                |
| Lbr8      | <i>Lactobacillus brevis</i>    | DQ268866                    | 100               |
| Lbr9      | <i>Lactobacillus brevis</i>    | DQ268866                    | 100               |
| Lbr11     | <i>Lactobacillus brevis</i>    | DQ268866                    | 100               |
| Lbr11     | <i>Lactobacillus brevis</i>    | DQ268866                    | 100               |
| Lbr12     | <i>Lactobacillus brevis</i>    | DQ268866                    | 99                |
| Lbr13     | <i>Lactobacillus brevis</i>    | DQ268866                    | 100               |
| Lbr14     | <i>Lactobacillus brevis</i>    | AP012167                    | 99                |
| Lbr15     | <i>Lactobacillus brevis</i>    | AP012167                    | 99                |
| Lbr16     | <i>Lactobacillus brevis</i>    | LC062086                    | 99                |
| Lbr17     | <i>Lactobacillus brevis</i>    | KT780303                    | 100               |
| Lbr18     | <i>Lactobacillus brevis</i>    | DQ268866                    | 99                |
| Lbr19     | <i>Lactobacillus brevis</i>    | DQ268866                    | 99                |
| Lbr20     | <i>Lactobacillus brevis</i>    | KU315055                    | 100               |
| Lbr21     | <i>Lactobacillus brevis</i>    | DQ268866                    | 99                |
| Lbr22     | <i>Lactobacillus brevis</i>    | DQ268866                    | 99                |
| Lbr23     | <i>Lactobacillus brevis</i>    | DQ268866                    | 100               |
| Lbr24     | <i>Lactobacillus brevis</i>    | DQ268866                    | 100               |
| Lbr25     | <i>Lactobacillus brevis</i>    | DQ268866                    | 100               |
| Lbr26     | <i>Lactobacillus brevis</i>    | DQ268866                    | 100               |
| Lca27     | <i>Lactobacillus casei</i>     | HM058794                    | 99                |
| Lca28     | <i>Lactobacillus casei</i>     | HM058896                    | 100               |
| Lca29     | <i>Lactobacillus casei</i>     | HM058896.1                  | 100               |
| Lca30     | <i>Lactobacillus casei</i>     | HM058896.1                  | 100               |
| Lca31     | <i>Lactobacillus casei</i>     | HM058839.1                  | 100               |
| Lpa32     | <i>Lactobacillus paracasei</i> | KU315090                    | 100               |
| Lpa33     | <i>Lactobacillus paracasei</i> | KT962976                    | 100               |
| Lpa34     | <i>Lactobacillus paracasei</i> | FM878598                    | 99                |
| Lpa35     | <i>Lactobacillus paracasei</i> | KU315079.1                  | 99                |

|       |                                |            |     |
|-------|--------------------------------|------------|-----|
| Lpa36 | <i>Lactobacillus paracasei</i> | KU315090.1 | 100 |
| Lhi37 | <i>Lactobacillus hilgardii</i> | FM878600   | 100 |
| Lhi38 | <i>Lactobacillus hilgardii</i> | LC064898   | 99  |
| Lhi39 | <i>Lactobacillus hilgardii</i> | FM878600   | 100 |
| Lhi40 | <i>Lactobacillus hilgardii</i> | AB262962   | 99  |
| Lhi41 | <i>Lactobacillus hilgardii</i> | AB262962   | 99  |
| Lhi42 | <i>Lactobacillus hilgardii</i> | AB262962   | 100 |
| Lhi43 | <i>Lactobacillus hilgardii</i> | AB262962   | 100 |
| Lhi44 | <i>Lactobacillus hilgardii</i> | AB262962   | 100 |
| Lhi45 | <i>Lactobacillus hilgardii</i> | AB262962   | 99  |
| Lhi46 | <i>Lactobacillus hilgardii</i> | LC064898   | 100 |
| Lhi47 | <i>Lactobacillus hilgardii</i> | LC064898   | 100 |
| Lhi48 | <i>Lactobacillus hilgardii</i> | LC064898   | 100 |
| Lhi49 | <i>Lactobacillus hilgardii</i> | AB262962   | 99  |
| Lhi50 | <i>Lactobacillus hilgardii</i> | FM878600   | 100 |

---

Table S3 Yeasts isolated in fermented grains

| Strain ID | Species                            | Related GenBank<br>sequence | Identity<br>(10%) |
|-----------|------------------------------------|-----------------------------|-------------------|
| Pf1       | <i>Pichia fermentans</i>           | KC494719.1                  | 100               |
| Ho2       | <i>Hanseniaspora osmophila</i>     | GU080047.1                  | 99                |
| Ho3       | <i>Hanseniaspora osmophila</i>     | GU080047.1                  | 99                |
| Ho4       | <i>Hanseniaspora osmophila</i>     | JQ512840.1                  | 99                |
| Sf5       | <i>Saccharomycopsis fibuligera</i> | CP012809.1                  | 100               |
| Sf6       | <i>Saccharomycopsis fibuligera</i> | CP012809.1                  | 100               |
| Sc7       | <i>Saccharomyces cerevisiae</i>    | EF192587.1                  | 99                |
| Sc8       | <i>Saccharomyces cerevisiae</i>    | KX119943.1                  | 99                |
| Sc9       | <i>Saccharomyces cerevisiae</i>    | HM191652.1                  | 99                |
| Sc10      | <i>Saccharomyces cerevisiae</i>    | HM191649.1                  | 100               |
| Sc11      | <i>Saccharomyces cerevisiae</i>    | KU862641.1                  | 100               |
| Sc12      | <i>Saccharomyces cerevisiae</i>    | GU080048.1                  | 100               |
| Sc13      | <i>Saccharomyces cerevisiae</i>    | HM191661.1                  | 99                |
| Sc14      | <i>Saccharomyces cerevisiae</i>    | KX428530.1                  | 99                |
| Sc15      | <i>Saccharomyces cerevisiae</i>    | HM107800.1                  | 99                |
| Sc16      | <i>Saccharomyces cerevisiae</i>    | EU884435.1                  | 100               |
| Sc17      | <i>Saccharomyces cerevisiae</i>    | HM191661.1                  | 100               |
| Sc18      | <i>Saccharomyces cerevisiae</i>    | KY109244.1                  | 99                |
| Sc19      | <i>Saccharomyces cerevisiae</i>    | KX428529.1                  | 99                |
| Sc20      | <i>Saccharomyces cerevisiae</i>    | HM101472.1                  | 99                |
| Sc21      | <i>Saccharomyces cerevisiae</i>    | HM107783.1                  | 99                |
| Sc22      | <i>Saccharomyces cerevisiae</i>    | HM191648.1                  | 100               |
| Sc23      | <i>Saccharomyces cerevisiae</i>    | KX428530.1                  | 99                |
| Sc24      | <i>Saccharomyces cerevisiae</i>    | KM527244.1                  | 99                |
| Sc25      | <i>Saccharomyces cerevisiae</i>    | KY109393.1                  | 100               |
| Wa26      | <i>Wickerhamomyces anomalus</i>    | KY110104.1                  | 99                |

## Reference

38. Xu W, Huang Z Y, Zhang X J, Li Q, Lu Z M, Shi J S, Xu Z H, Ma Y H. Monitoring the microbial community during solid-state acetic acid fermentation of Zhenjiang aromatic vinegar[J]. Food Microbiology, **2011**, 28(6): 1175-1181.
39. Duniere L, Jin L, Smiley B, Qi M, Rutherford W, Wang Y, Mcallister T. Impact of adding *Saccharomyces* strains on fermentation, aerobic stability, nutritive value, and select lactobacilli populations in corn silage[J]. Journal of Animal Science, **2015**, 93(5): 82-87.

40. Wu S H, Xu S J, Chen X, Sun H S, Hu M L, Bai Z H, Zhuang G Q, Zhuang X L. Bacterial communities changes during food waste spoilage[J]. Scientific Reports, **2018**, 8(1): 20-29.
41. Katharina Z, Olivier C, Patrick M L, Joana C, Aline L, Isabelle M P. Characterization of the yeast ecosystem in grape must and wine using real-time PCR[J]. Food Microbiology, **2010**, 27(5): 559-567
